# Supplementary material
Source: PubMed Central journal article supplement (PMC8821954)
Supplement: mmc1.pdf [file mmc1.pdf]

YMTHE, Volume 30

## **Supplemental Information**

### **Extracellular vesicle-mediated communication between hepatocytes and natural killer cells promotes hepatocellular tumorigenesis**

**Zhijun Liu, Yuyu You, Qiyi Chen, Guobang Li, Wenfeng Pan, Qing Yang, Jiajun Dong, Yi Wu, Jin-Xin Bei, Chaoyun Pan, Fuming Li, and Bo Li**

# Supplemental Figures

## Figure S1

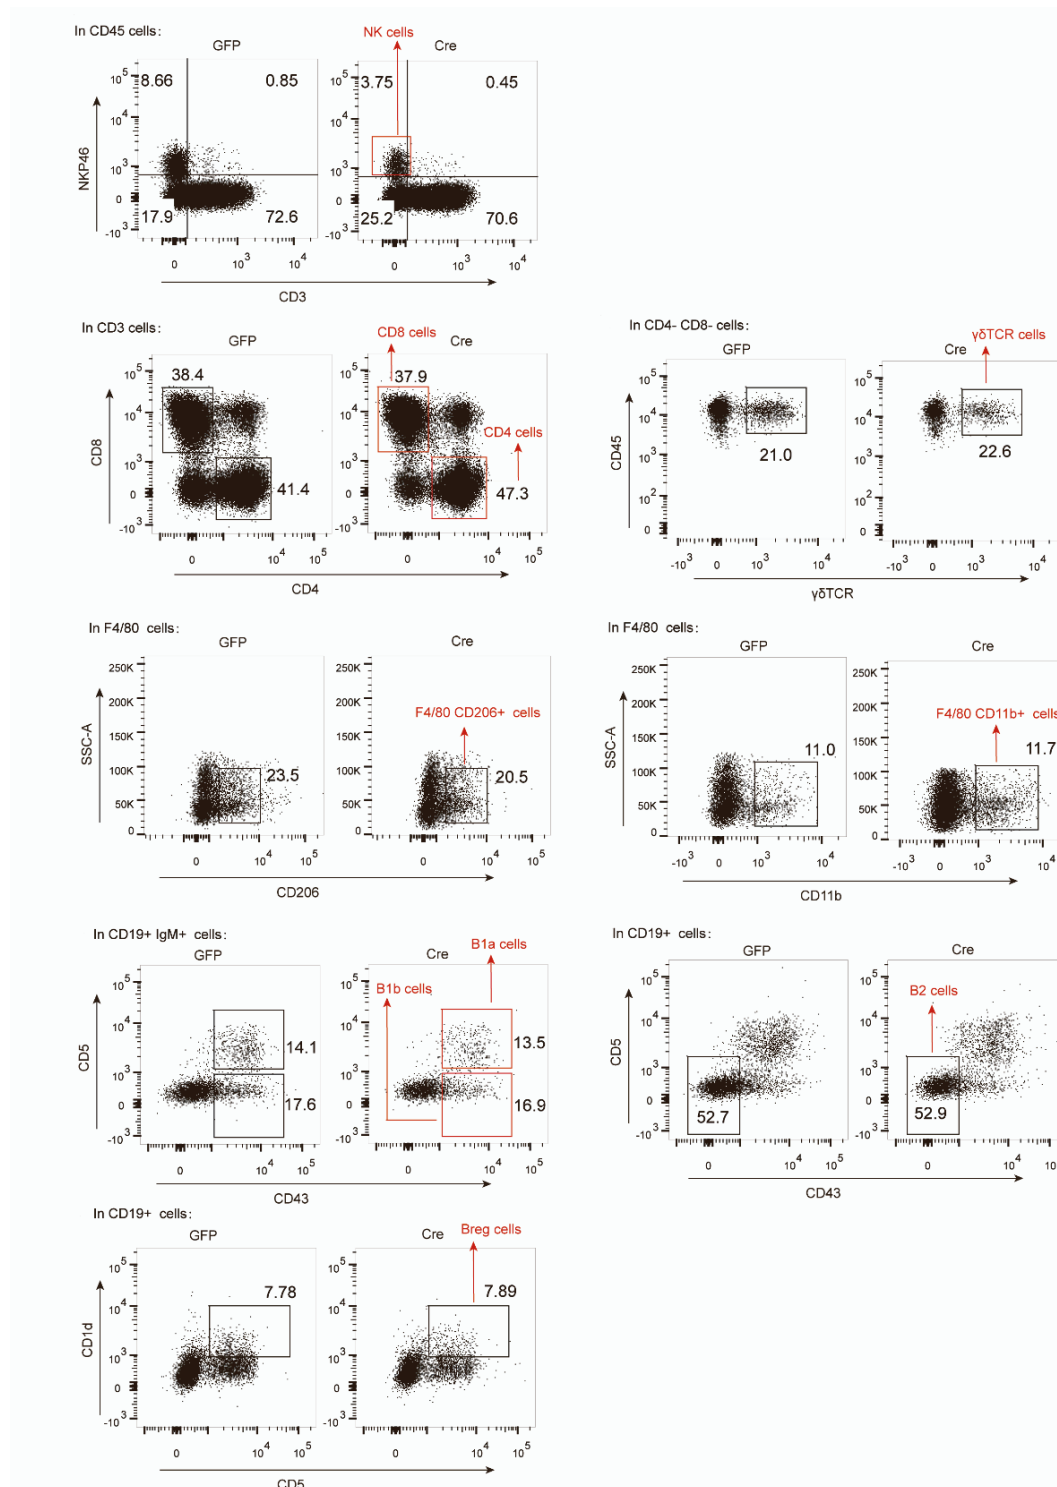

Figure S1. Gating strategy for leukocytes isolated from harvested tumor tissues in Figure 1.

**Figure S2**

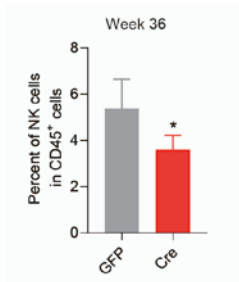

**Figure S2. Hepatocyte-specific FBP1 loss restrains NK cells at 36 weeks in the DEN-treated Cre cohort compared to the control GFP cohort.** Flow cytometry analysis of NK cell population in the liver tissues from DEN treated mice at Week 36 (n=6). Data represent mean  $\pm$  SEM. Two-tailed unpaired t tests were performed to calculate P values. \*P < 0.05.

**Figure S3**

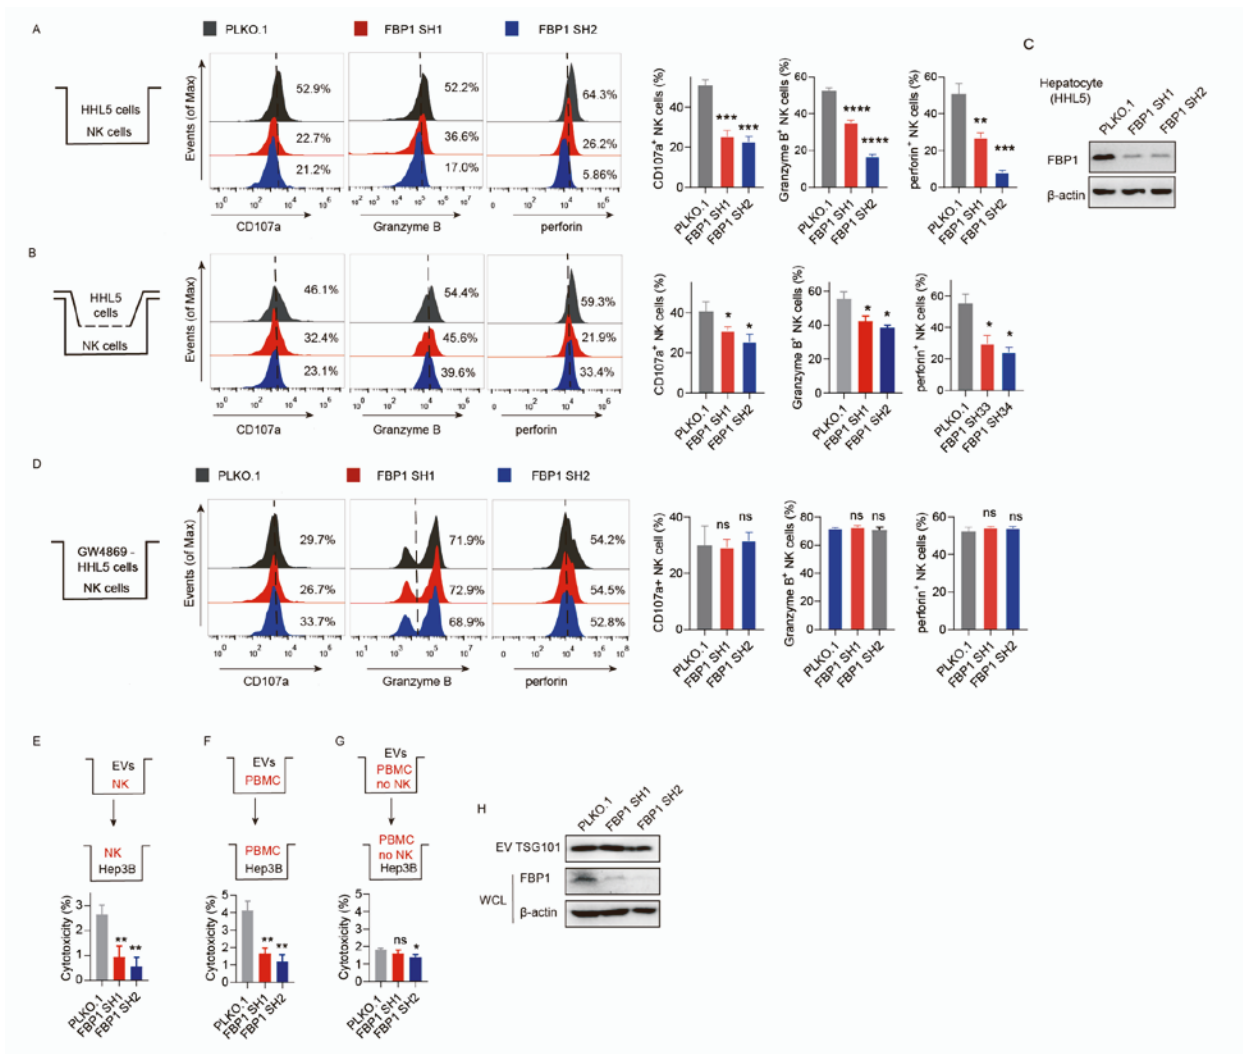

**Figure S3. EVs secreted by FBP1-deficient hepatocytes impair NK cell function.**

(A) Representative histograms (left) and quantifications (right) of indicated markers in NK cells. Flow cytometry analysis of NK cells directly co-cultured with hepatocytes with control PLKO.1 or FBP1 shRNAs.

(B) Representative histograms (left) and quantifications (right) of indicated activation markers in NK cells.

Flow cytometry analysis of NK cells co-cultured with hepatocytes with control PLKO.1 or FBP1 shRNAs in a Transwell system.

(C) Western blots confirming the knockdown efficiencies of FBP1 shRNAs.

(D) Representative histograms (left) and quantifications (right) of indicated markers in NK cells directly co-

cultured with hepatocytes with control PLKO.1 or FBP1 shRNAs after GW4869 treatments.

(E-G) Cytotoxicity assays against Hep3B cells using NK cells (E), PBMCs (F) or NK-depleted PBMCs (G)

cultured with EVs derived from hepatocytes with or without FBP1.

(H) Western blots confirming the knockdown efficiencies of FBP1 shRNAs.

Data represent mean  $\pm$  SEM. Two-tailed unpaired t tests were performed to calculate P values. \*\*P < 0.01; \*\*\*P

< 0.001; \*\*\*\*P < 0.0001; ns, no significance.

**Figure S4**

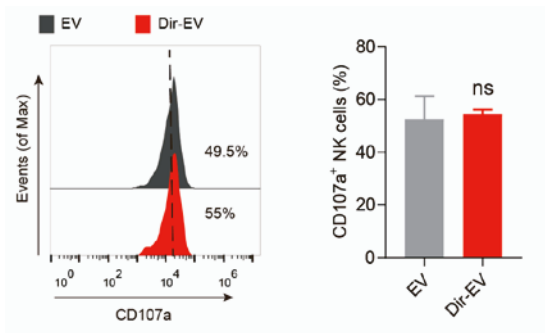

**Figure S4. Dir staining fails to affect the EV activity.**

FCS analysis of NK cells incubated with EVs with or without Dir staining. Representative histogram (left) and quantification (right) of CD107a<sup>+</sup> NK cells. Data represent mean  $\pm$  SEM. Two-tailed unpaired t tests were performed to calculate P values. ns, no significance.

**Figure S5**

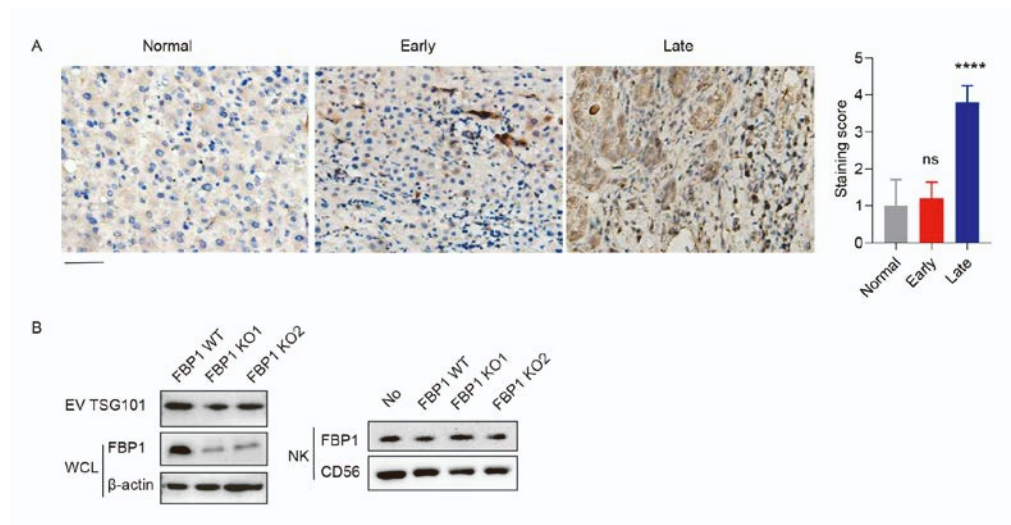

**Figure S5. EVs secreted by hepatocytes with or without FBP1 depletion are unable to affect the endogenous FBP1 expression in NK cells, which are not regulated by TGF- $\beta$  during tumorigenesis.**

(A) Representative images (left) and quantifications (right) of TGF- $\beta$  stainings in normal adjacent, early and late human HCC tissue sections. (scale bar, 50  $\mu$ m).

(B) Western blotting confirming knockdown efficiencies of FBP1 by knockout clones in HHL5 cells and TSG101 expression in EVs (left). Western blotting assessing the FBP1 expression in NK cells incubated with EVs secreted from HHL5 cells containing normal or silenced FBP1 (right).

**Figure S6**

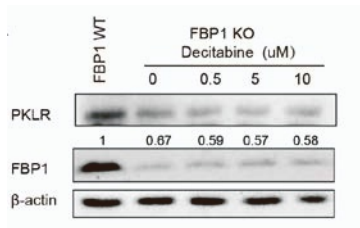

**Figure S6. Decitabine fails to rescue the protein expression of PKLR in FBP1-depleted hepatocytes.**

Western blot analysis of FBP1 WT and KO HHL5 clones treated with the DNMT inhibitor Decitabine with indicated doses.



**Figure S7**

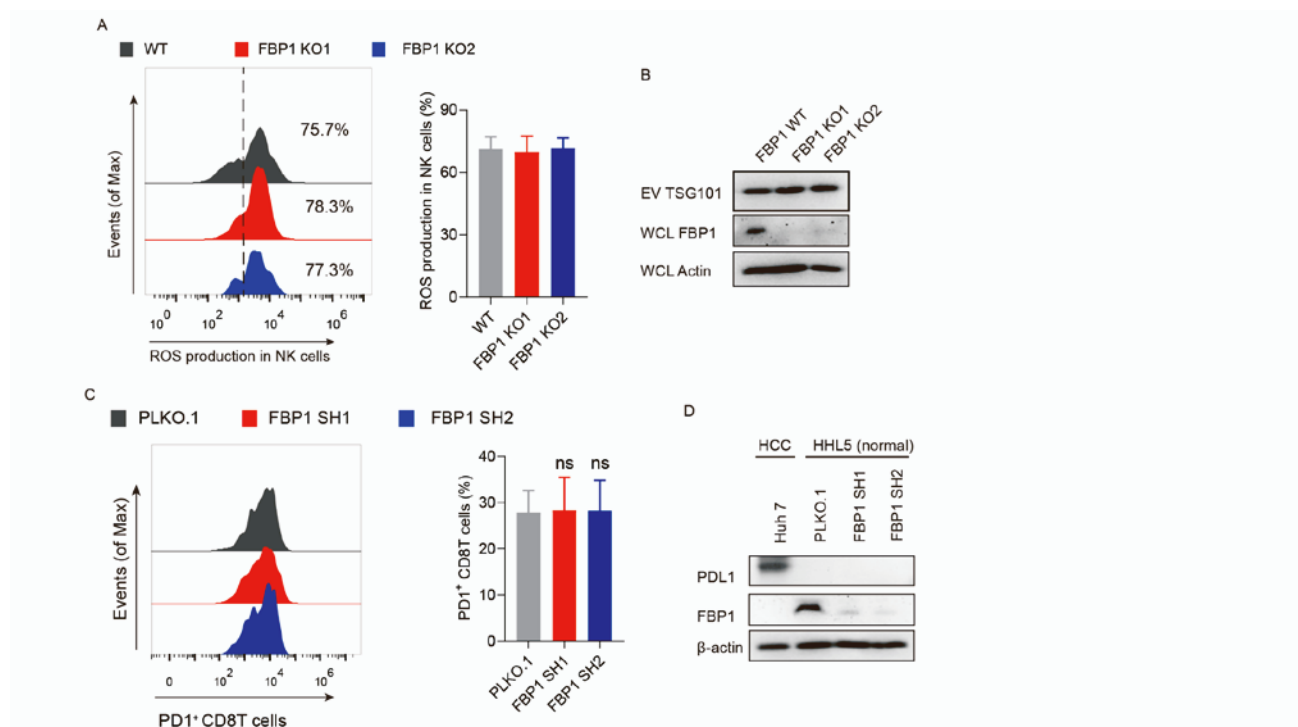

**Figure S7. EVs secreted by hepatocytes with or without FBP1 does not affect the ROS levels of hepatic NK cells and exhausted CD8 T cells.**

(A) ROS production in NK cells from mouse liver were assessed by flow cytometry analysis after tail vein injecting EVs secreted from indicated hepatocytes into C57BL/6 mice for 24h. The histograms (left) and quantification (right) of ROS production were shown.

(B) Western blotting confirming knockdown efficiencies of FBP1 by knockout clones in HHL5 cells and TSG101 expression in EVs.

(C) Exhausted CD8 T cells were analyzed by detecting PD1<sup>+</sup> CD8 T cells using flow cytometry. Hepa1-6 cells were inoculated as subcutaneous tumor grafts into C57BL/6 mice, and mice were treated with EVs secreted from Hepa1-6 cells with or without FBP1 through intratumoral injection two days a week until the endpoint.

(D) Western blotting of FBP1 and PD-L1 expression in HHL5 and Huh7 cells.

**Figure S8**

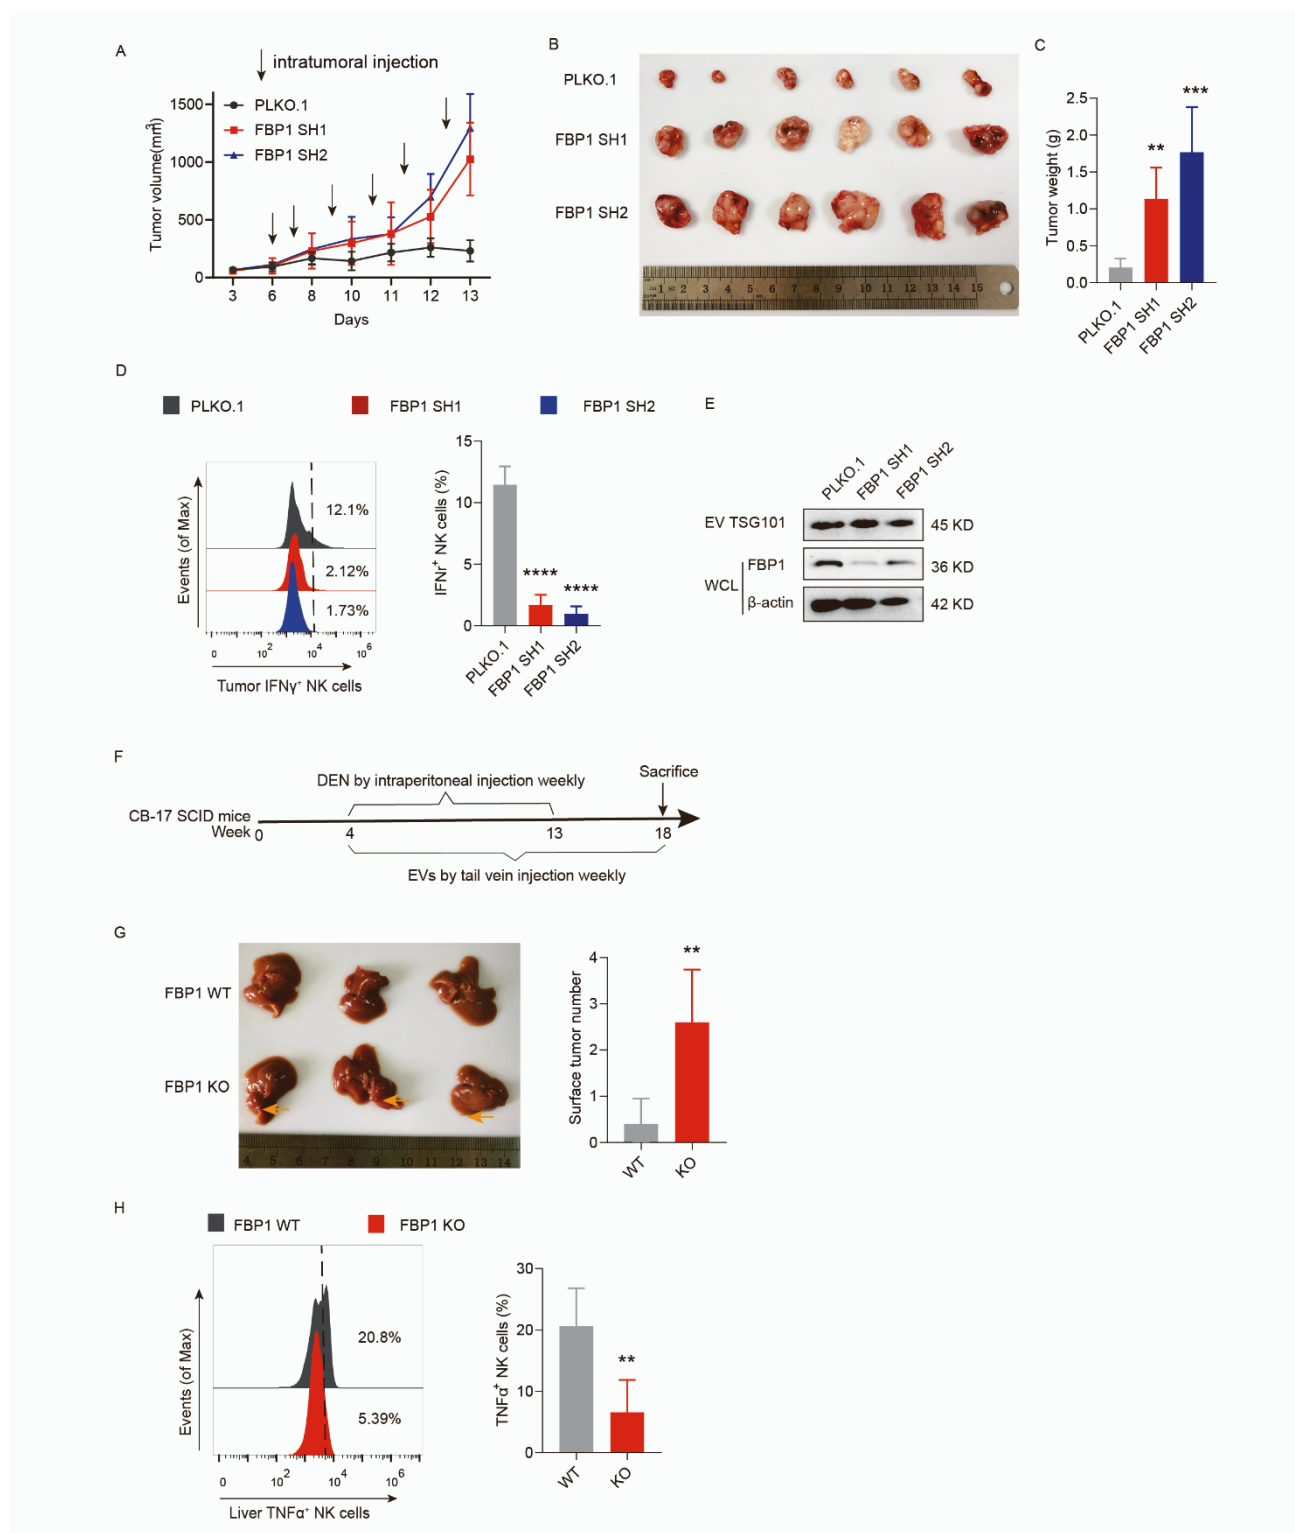

**Figure S8. EVs secreted by FBP1-depleted liver cells accelerate tumor progression *in vivo*.**

(A-C) Hepa1-6 cells were inoculated as subcutaneous allografts in C57BL/6 mice, which were treated with EVs

secreted from Hepa1-6 cells with or without FBP1 through intratumoral injection as indicated frequency until the endpoint. The volume growth of allograft tumors in mice was measured (A). The resulting tumor images (B) and weights (C) were shown.

(D) Representative histograms and quantifications of activated NK cells (IFN positive) in isolated tumors tissues, n=6.

(E) Western blot analysis of FBP1 and beta-actin expressions in WCL, and TSG101 expression in EVs secreted by Hepa1-6 cells.

(F) Experimental scheme examining the effect of hepatocyte-derived EVs in DEN-induced HCC model using the CB17-SCID immunocompromised mice.

(G) Representative images of whole livers (left) and the number of surface tumor nodules (right) in DEN-treated CB17-SCID mice after injecting EVs secreted by indicated clones, n=5.

(H) Representative histograms and quantifications of activated NK cells (TNF $\alpha$  positive) in aforementioned livers, n=5.

**Figure S9**

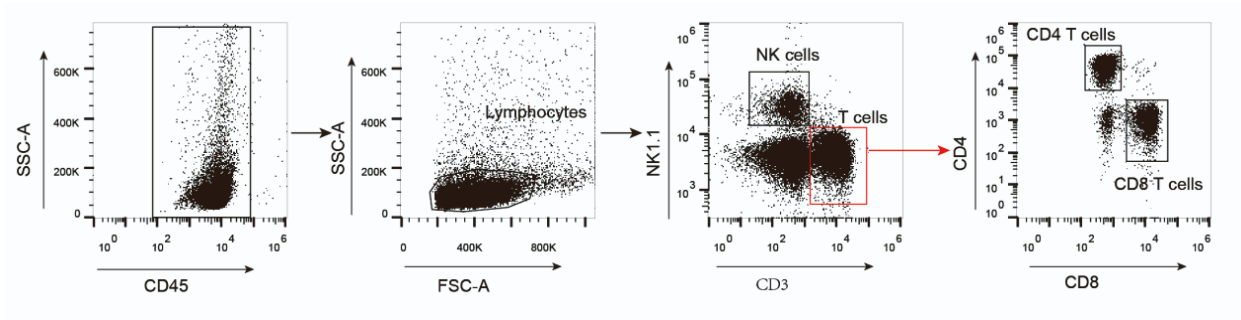

**Figure S9. Gating strategy for leukocytes isolated from harvested tumor tissues in Figure 6.**

## Supplemental Tables

**Table S1. Recognition sequences of shRNAs and sgRNAs.**

| <b>shRNA or sgRNA</b> | <b>Recognition sequence (5' to 3')</b> |
|-----------------------|----------------------------------------|
| EZH2 shRNA1           | TATTGCCTTCTCACCAGCTGC                  |
| EZH2 shRNA2           | CGGAAATCTTAAACCAAGAAT                  |
| PKLR shRNA1           | GCATTGAAAGTGGAAAGCTCC                  |
| PKLR shRNA2           | CCCACTGAGGTCACCGCCATT                  |
| FBP1 shRNA1           | CCTTGATGGATCTTCCAACAT                  |
| FBP1 shRNA2           | CGACCTGGTTATGAACATGTT                  |
| FBP1 sgRNA1           | GGACACAAGGCAATCGATGT                   |
| FBP1 sgRNA2           | GCCGTCACTGAGTACATCCAG                  |
| Mouse FBP1 shRNA1     | CATAGCTTATGTCATGGAGAA                  |
| Mouse FBP1 shRNA2     | CTACAGCCTTAATGAGGGTTA                  |

**Table S2. Sequences of primers used for RT-PCR and cloning.**

| <b>Gene</b>  | <b>Primer</b> | <b>Sequence (5' to 3')</b> |
|--------------|---------------|----------------------------|
| PKLR 3-UTR-1 | Forward       | TCCCTACCTGAGGCCTATCTGAG    |
|              | Reverse       | ACTGGGATTAAGACTCAAGGCA     |
| PKLR 3-UTR-2 | Forward       | AGCCTACCCTTGTACCCCAT       |
|              | Reverse       | CAGGTAGGGAGGGTCAGGAA       |
| PKLR 3-UTR-3 | Forward       | AATCTGGGCATCTCGTGCCA       |
|              | Reverse       | AGCCAGGACAGTGGTCTACA       |
| PKLR 3-UTR-4 | Forward       | CCTGCACCAACAGCAAATC        |
|              | Reverse       | TGAGAGAGGGAGAAGGACCG       |
| PKLR CDS-1   | Forward       | TCAAGGCCGGGATGAACATTG      |
|              | Reverse       | CTGAGTGGGGAACCTGCAAAG      |
| PKLR CDS-2   | Forward       | GGACACGGCATCAAGATCATC      |
|              | Reverse       | GCAGCGCCCAATCATCATC        |
| GDF7         | Forward       | TCCAGCCTTAACGACGCAG        |
|              | Reverse       | CAACGGCGGAGAAGTCCAG        |
| PAX7         | Forward       | TCCAAGATTCTTTGCCGCTAC      |
|              | Reverse       | GGTCACAGTGCCCATCCTTC       |
| BMI1         | Forward       | CCACCTGATGTGTGTGCTTTG      |
|              | Reverse       | TTCAGTAGTGGTCTGGTCTTGT     |
| GAPDH        | Forward       | GGAGCGAGATCCCTCCAAAAT      |
|              | Reverse       | GGCTGTTGTCATACTTCTCATGG    |
| HOXA7        | Forward       | CGTTCCGGGCTTATACAATGT      |
|              | Reverse       | CTCGTCCGCTTGTGCGCAG        |
| HOXC13       | Forward       | GCCGTCTATACGGACATCCC       |
|              | Reverse       | GGTAGGCGCAAGGCTTCTG        |
| EPHB3        | Forward       | ATACCAGGTGTGTAATGTGCG      |
|              | Reverse       | CGCTGTCAGCCTCGTAGTAG       |
| DUOXA2       | Forward       | GCTGAACGAGACCATTGACTAC     |
|              | Reverse       | CTCGGTGTGAACTTCTCCGC       |
| OSR2         | Forward       | TCCGCCTAAGATGGGAGACC       |
|              | Reverse       | GGTAAAGTGTCTGCCGCAAAA      |
| DHH          | Forward       | CACCACGCTCAGGATTCCTC       |
|              | Reverse       | CAACCATACTTGTGCGGTC        |
| NUP210       | Forward       | ATGCCTTCCGATCAGTACGAG      |
|              | Reverse       | CGACCACGTAGATAGTGCTGT      |
| CDKN2C       | Forward       | GGGGACCTAGAGCAACTTACT      |
|              | Reverse       | CAGCGCAGTCCTTCCAAAT        |
| EGR3         | Forward       | GACATCGGTCTGACCAACGAG      |
|              | Reverse       | GGCGAACTTTCCCAAGTAGGT      |
| 18S          | Forward       | CTACCACATCCAAGGAAGCA       |
|              | Reverse       | TTTTTCGTCACTACCTCCCCG      |

**Table S3. Antibodies used in flow cytometry analysis.**

| <b>Antibodies used in flow cytometry</b>       | <b>Source</b>            | <b>Identifier</b> |
|------------------------------------------------|--------------------------|-------------------|
| PE anti-human CD107a antibody                  | BioLegend                | Cat#328608        |
| APC anti-human CD56 antibody                   | BioLegend                | Cat#318310        |
| PE anti-human perforin antibody                | BioLegend                | Cat#308106        |
| PE anti-human/mouse granzyme B antibody        | BioLegend                | Cat#372208        |
| APC anti-human CD69 antibody                   | BioLegend                | Cat#310910        |
| FITC anti-human CD3 antibody                   | BioLegend                | Cat#300406        |
| Purified anti-mouse NK-1.1 Antibody            | BioLegend                | Cat#108702        |
| Brilliant Violet 570™ anti-mouse CD45 antibody | BioLegend                | Cat#103136        |
| eFluor 450 anti-mouse IFN gamma antibody       | Thermo Fisher Scientific | Cat#48-7311-8     |
| PE-Cyanine7 CD4 antibody                       | eBioscience              | Cat#25-0041-81    |
| FITC anti-mouse CD8a antibody                  | eBioscience              | Cat#11-0081-82    |
| Alexa Fluor 700 anti-mouse CD3 antibody        | eBioscience              | Cat#56-0032-82    |
| APC anti-mouse CD45R/B220 antibody             | eBioscience              | Cat#553091        |
| APC anti-mouse TNF- $\alpha$ antibody          | BioLegend                | Cat#506307        |
| PE anti-mouse NK1.1 antibody                   | BioLegend                | Cat#108707        |
| APC anti-mouse CD19 antibody                   | BD Biosciences           | Cat#550992        |
| APC-Cy7 anti-mouse CD4 antibody                | BD Biosciences           | Cat#552051        |
| PE-Cy7 anti-mouse CD8a antibody                | BD Biosciences           | Cat#552877        |
| FITC anti-mouse CD45 antibody                  | BD Biosciences           | Cat#561088        |
| V450 anti-mouse CD3e antibody                  | BD Biosciences           | Cat#560801        |
| PE-Cy7 anti-mouse CD45 antibody                | BD Biosciences           | Cat#552848        |
| V450 anti-mouse CD11c antibody                 | BD Biosciences           | Cat#560521        |
| PE anti-mouse CD1d antibody                    | BD Biosciences           | Cat#553846        |
| APC anti-mouse CD5 antibody                    | BD Biosciences           | Cat#561895        |
| V450 anti-mouse CD19 antibody                  | BD Biosciences           | Cat#560375        |
| PerCP Cy™5.5 anti-mouse CD11b antibody         | BD Biosciences           | Cat#561114        |
| PE anti-mouse $\gamma\delta$ TCR antibody      | Thermo Fisher Scientific | Cat#12-5711-82    |
| PerCP-eFluor 710 anti-mouse NKp46 antibody     | Thermo Fisher Scientific | Cat#46-3351-80    |
| PE anti-mouse F4/80 antibody                   | Thermo Fisher Scientific | Cat#12-4801-82    |
| FITC anti-mouse IgM antibody                   | BioLegend                | Cat#406505        |
| FITC anti-mouse CD206 antibody                 | Bio-Rad                  | Cat#MCA2235FT     |
